# Supplementary material
Source: PubMed Central journal article supplement (PMC5776465)
Supplement: ismej2017185x1.pdf [file ismej2017185x1.pdf]

## 1 **Supplementary information**

2 A detailed description of the original model, including derivation of all equations, model  
3 calibration, lists of used parameters, and sensitivity analyses can be found in Wing &  
4 Halevy (2014) and the supporting information therein. Here we present all modifications  
5 to the original model as well as their implications.

6

## 7 **Stoichiometry of redox reactions**

8 When not stated differently, we always used the simplest possible case to find absolute  
9 limits on maximum achievable S isotope fractionation. This means we assumed that only  
10 one electron carrier transfers electrons to Apr, and only one electron carrier transfers  
11 the 6 electrons to DsrAB, partly through the DsrC cycle (Table S2). When special cases  
12 were explored, e.g., several proposed electron confurcation schemes for APS reduction,  
13 and a stepwise reduction of  $\text{SO}_3^{2-}$  with 2 different electron carriers, it is explicitly  
14 mentioned in the main text.

15

## 16 **Linking S isotope fractionation, sulfate availability in the cell's environment, and csSRR 17 to enzyme kinetics and to reaction thermodynamics.**

18 The net rate ( $J$ ) of a reversible enzymatic reaction can be expressed as (Flamholz et al.,  
19 2013):

$$20 \quad J = V_{max} \times \frac{\Pi_j \left( \frac{[r_j]}{K_{Mj}} \right)^{n_j}}{1 + \Pi_j \left( \frac{[r_j]}{K_{Mj}} \right)^{n_j} + \Pi_i \left( \frac{[p_i]}{K_{Mi}} \right)^{m_i}} \times \left( 1 - e^{-\frac{\Delta G_r}{RT}} \right), \quad (8)$$

21 where  $V_{max}$  is the maximum metabolic rate capacity,  $[r_j]$  is the concentration of the  
22 reactant  $j$ ,  $K_{Mj}$  is the half-saturation constant of the reactant  $j$  at the enzyme,  $[p_i]$  is the  
23 concentration of the product  $i$ , and  $K_{Mi}$  is the half-saturation constant of the product  $i$   
24 at the enzyme.  $n_j$  and  $m_i$  are the stoichiometric coefficients of the reactant  $j$  and the  
25 product  $i$ , respectively. Combining equations 6 and 7 from the main text with equation 8  
26 above for each step of the linear metabolic reaction network, solving for  $f$  of each step,  
27 and substituting in equations 2-5 from the main text, ultimately links the overall isotope  
28 fractionation to the reaction rate, to intracellular and extracellular metabolite  
29 concentrations, to enzyme kinetic parameters, and to the Gibbs free energies of the  
30 reactions. Rate-fractionation relationships and their dependence on sulfate  
31 concentrations and temperature, as well as a set of experimentally accessible  
32 biochemical information are available for DSR, which has allowed calibration of the  
33 model and the quantitative prediction of S isotope fractionation as a function of  
34 physiological, enzymatic, and environmental conditions (Wing & Halevy, 2014).

35

### 36 **Reversibility of enzymatic reactions during DSR.**

37 The observation of large fractionation at low respiration rates requires reversibility of all  
38 steps during DSR. Sulfate uptake into the cell, sulfate activation to APS, and APS  
39 reduction to  $\text{SO}_3^{2-}$  are fully reversible steps (Trüper & Fischer, 1982; Cypionka, 1995;  
40 Frigaard & Dahl, 2009). Whether or not the full enzyme-catalyzed  $\text{SO}_3^{2-}$  reduction to  $\text{H}_2\text{S}$   
41 can also proceed in the reverse direction during DSR is unclear. It has been suggested  
42 that at least the first reduction step, i.e., the transfer of the first 2 electrons from an

43 unknown physiological electron donor to  $\text{SO}_3^{2-}$  is reversible (Brunner et al., 2012).  
44 Whether or not the DsrC cycle is reversible in sulfate-reducing organisms is debated,  
45 even though the observed transfer of a  $^{35}\text{S}$  spike from extracellular product sulfide to  
46 extracellular substrate sulfate in growing cultures of sulfate reducing microbes suggests  
47 at least some degree of reversibility (Trudinger & Chambers, 1973; Holler et al., 2011).  
48 Importantly, even if future work shows that this last  $\text{H}_2\text{S}$ -forming step is irreversible, our  
49 model predictions and the results of this study remain valid, as large equilibrium  
50 fractionation exists between  $\text{SO}_3^{2-}$  and  $\text{S}^0$  (60‰ at 25°C; Otake et al. (2008)), which is a  
51 probable intermediate in the reduction of  $\text{SO}_3^{2-}$  to  $\text{H}_2\text{S}$ . Hence, strictly speaking, large  
52 fractionation at low respiration rates as observed in culture experiments and in natural  
53 environments requires nearly full reversibility of all reactions upstream of the  $\text{H}_2\text{S}$ -  
54 forming step.

55

56  **$R_{r/o}$ ,  $K_M$  values, and electron carrier identity limit achievable S isotope fractionation.**

57 Large fractionation (>55‰) is only possible when each step during DSR is close to the  
58 thermodynamic limit (Fig. 1) and each reversibility term ( $f$ ) in equations 2 to 5  
59 approaches unity. In order to identify the most sensitive parameters controlling this  
60 reversibility, we combined equations 6, 7, and 8 and solved for  $f$ . For the example of APS  
61 reduction to  $\text{SO}_3^{2-}$  and adenosine monophosphate (AMP), the metabolic reaction is:

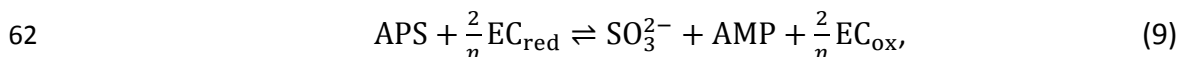

63 where  $n$  is the number of electrons carried by the respective electron carrier involved in  
 64 APS reduction. The reversibility of this reaction ( $f_{SO_3^{2-},APS}$ ) is a direct function of the Gibbs  
 65 free energy (equation 6), which for the APS reduction step is:

$$66 \quad \Delta G_r = \Delta G'^{\circ} + RT \ln \left( \frac{[SO_3^{2-}][AMP][EC_{ox}]^{\frac{2}{n}}}{[APS][EC_{red}]^{\frac{2}{n}}} \right). \quad (10)$$

67 In order for  $f_{SO_3^{2-},APS}$  to approach 1,  $\Delta G_r$  must approach 0 (equation 6). The standard-  
 68 state Gibbs free energy,  $\Delta G'^{\circ}$ , can be calculated from the stoichiometry of the metabolic  
 69 reaction and the redox potentials of the half reactions ( $APS \rightarrow AMP + HSO_3^-$ , and  $EC_{ox} \rightarrow$   
 70  $EC_{red}$ ) at standard-state conditions, and approximately varies from  $-60 \text{ kJ mol}^{-1}$  for APS  
 71 reduction with ferredoxin to  $21 \text{ kJ mol}^{-1}$  for APS reduction with rubrerythrin,  
 72 respectively (Table S3). Intracellular AMP concentrations have been measured in a  
 73 model sulfate reducer (Yagi & Ogata, 1996) and are here maintained constant at 0.3  
 74 mM. For illustration, we assume that menaquinone is the physiological electron donor  
 75 to sulfite reductase. In this situation, sulfite concentrations are controlled by cell  
 76 external  $H_2S$  concentrations and are therefore constant for specified experimental  
 77 conditions (Wing & Halevy, 2014). APS concentrations at steady state can then be  
 78 calculated by modifying equation 8 and solving for [APS]:

$$[APS] = \frac{\frac{J}{v_{max}} K_{M(APS)} K_{M(EC_{red})}^{\frac{2}{n}}}{[EC_{red}]^{\frac{2}{n}} \left(1 - \frac{J}{v_{max}}\right)} + \dots$$

$$\dots + \frac{\frac{J}{v_{max}} K_{M(APS)} K_{M(EC_{red})}^{\frac{2}{n}} [SO_3^{2-}][AMP][EC_{ox}]^{\frac{2}{n}}}{[EC_{red}]^{\frac{2}{n}} \left(1 - \frac{J}{v_{max}}\right) K_{M(SO_3^{2-})} K_{M(AMP)} K_{M(EC_{ox})}^{\frac{2}{n}}} + \dots$$

79 
$$\dots + \frac{[SO_3^{2-}][AMP][EC_{ox}]^2 e^{\frac{2}{RT} \Delta G'^{\circ}}}{[EC_{red}]^2 \left(1 - \frac{J}{v_{max}}\right)}. \quad (11)$$

80 In the expression in equation 10,  $\Delta G_r$  decreases with increasing [APS]. Equation 11  
 81 reveals that three model parameters control [APS] and, therefore,  $\Delta G_r$  and the  
 82 reversibility of the reaction at a specific respiration rate: *i*) the standard-state Gibbs free  
 83 energy of the reaction,  $\Delta G'^{\circ}$ , which appears in the third term in the right-hand side of  
 84 equation 11, *ii*) the ratio of reduced to oxidized electron carrier concentrations ( $R_{r/o} =$   
 85  $[EC_{red}] / [EC_{ox}]$ ), which appears in all three terms in the right-hand side of the equation,  
 86 and *iii*) enzyme kinetic parameters, which appear in the first two terms. As outlined  
 87 above,  $\Delta G'^{\circ}$  depends directly on the identity and reduction potential of the electron  
 88 carrier involved (Table S3). Little is known about the value of  $R_{r/o}$  in sulfate reducers. We  
 89 therefore varied  $R_{r/o}$  over a wide range of values and explored the dependence of the  
 90 maximum achievable S isotope fractionation on this parameter (Fig. 4). Enzyme kinetic  
 91 parameters, and specifically the half saturation concentrations, are relatively well  
 92 constrained from independent biochemical experiments (Dataset S1). Nevertheless, we  
 93 here allowed  $K_M$  values to vary within a larger range than suggested from experimental  
 94 data in order to explore the dependence of the reversibility of the reaction, and the  
 95 maximum achievable S isotope fractionation, on these parameters.

96

97 **Sensitivity of maximum achievable S isotope fractionation to  $K_M$  values.**

98 Besides the standard-state Gibbs free energies of each reaction step and  $R_{r/o}$ , enzyme  
 99 kinetic parameters, specifically the half-saturation constants, potentially control the

100 reversibility of the steps and hence fractionation at low respiration rates. With some  
101 exceptions  $K_M$  values are relatively well constrained from independent biochemical  
102 analyses in several sulfate reducing bacteria and archaea, and most of those values lie  
103 between 10  $\mu\text{M}$  and 400  $\mu\text{M}$  (see Dataset S1) (Bramlett & Peck, 1975; Lampreia et al.,  
104 1994; Wolfe et al., 1994; Yagi & Ogata, 1996; Fritz et al., 2002). All default values used in  
105 this study are given in Table S5 and are indicated with horizontal grey lines in Fig. S1. A  
106 relatively narrow range of  $K_M$  values is also observed in many other catalytic reactions.  
107 Bar-Even et al. (2011) analyzed reported enzyme kinetic parameters of thousands of  
108 enzymes from prokaryotic and eukaryotic organisms and found that 60% of all  $K_M$  values  
109 range between 10  $\mu\text{M}$  and 1000  $\mu\text{M}$ , with a median value of 130  $\mu\text{M}$ , and that over 99%  
110 of all analyzed enzymes have  $K_M$  values  $> 0.1 \mu\text{M}$ . We therefore explored the sensitivity  
111 of the maximum achievable S isotope fractionation to each of the substrate  $K_M$  values in  
112 the Apr- and Dsr-catalyzed reactions within the range of 0.1  $\mu\text{M}$  to 100 mM. For a given  
113 electron carrier, reversibility decreases exponentially with increasing  $K_M$  values for the  
114 substrates in the given metabolic reactions (APS in the Apr-catalyzed reaction and  $\text{SO}_3^{2-}$   
115 in the Dsr-catalyzed reaction; Fig. S1A, B). On the other hand, the reversibility increases  
116 exponentially with increasing  $K_M$  values for the products in the given metabolic  
117 reactions ( $\text{SO}_3^{2-}$  and AMP in the Apr-catalyzed reaction and  $\text{H}_2\text{S}$  in the Dsr-catalyzed  
118 reaction; Fig. S1E, F, G). The reversibility of APS reduction is not sensitive to the  $K_M$  value  
119 of the electron carrier under the assumption that the reduced and oxidized forms of the  
120 electron carrier have identical  $K_M$  values (Fig. S1C). The reversibility of  $\text{SO}_3^{2-}$  reduction is  
121 sensitive to the  $K_M$  value of the electron carrier only if  $K_M$  values are very large ( $> 1 \text{ mM}$ ).

122 Lowering the  $K_M$  value to below this threshold does not affect the reversibility of the  
123 reaction, and thus the maximum achievable S isotope fractionation (Fig. S1D).

124 In order to isolate the influence of electron carrier identity on the absolute limit on  
125 maximum achievable S isotope fractionations (Fig. 3B), we chose a set of extreme  $K_M$   
126 values that maximized the reversibility effects discussed above (Table S5; Dataset S1).

127 Whenever there was a reported range of  $K_M$  values we chose the value that yielded the  
128 largest possible reversibility (fractionation) at the lowest possible  $\Delta G'^{\circ}$ . No data exists on  
129  $K_M(\text{H}_2\text{S})$  in the Dsr-catalyzed reaction, and we therefore use the upper limit of 100 mM  
130 (Bar-Even et al., 2011) as our extreme value (Fig. S1F; Table S5). Moreover, some studies  
131 suggest that  $K_M(\text{APS})$  in the Apr-catalyzed reaction might be unusually small ( $<20 \mu\text{M}$ ,  
132 (Fritz et al., 2002) or  $\approx 1 \mu\text{M}$ , (Yagi & Ogata, 1996). We let this  $K_M$  value to vary over an  
133 even larger range than suggested based on Bar-Even et al. (2011), and set the most  
134 extreme value to 1 nM (Fig. S1A; Table S5). Importantly, even at these extremes, it is not  
135 possible to achieve large fractionation at low csSRR for some electron carriers (Fig. 3B).

136 The reason for this is that even at the most extreme  $K_M$  values (Table S5; Fig. S1), the  
137 energetics of APS and  $\text{SO}_3^{2-}$  reduction with some electron donors are too favorable to  
138 ever achieve near-reversibility ( $f \rightarrow 1$ ) and large (near-equilibrium) isotope  
139 fractionation. As in the case of varying  $R_{r/o}$ , the largest fractionation achievable depends  
140 on the  $\Delta G'^{\circ}$  of the reactions in the DSR pathway, and hence, on the standard redox  
141 potential and the identity of the physiological electron carriers involved in APS and  $\text{SO}_3^{2-}$   
142 reduction. In summary,  $R_{r/o}$  and  $K_M$  values affect the shape of the transition from the  
143 smallest possible to the largest possible fractionation, but eventually it is the identity of

144 the electron carrier that controls the magnitude of the minimum and maximum  
145 fractionation.



146 **Table S1. Two criteria that need to be fulfilled by any proposed energy metabolism**  
147 **scheme for dissimilatory sulfate reduction.**

| Criterion                                             | Methodological approach                                                                                    |
|-------------------------------------------------------|------------------------------------------------------------------------------------------------------------|
| 1. Large S isotope fractionation at low csSRR         | a) Vary $R_{r/o}$ to extremes<br>b) Vary $K_M$ values to extremes<br>c) Find limits on $\Delta G'^{\circ}$ |
| 2. Reasonable intracellular metabolite concentrations | Find limits on $R_{r/o}$ for electron carriers that fulfilled criterion 1.                                 |

148

149

150 **Table S2. Metabolic redox reactions during dissimilatory sulfate reduction.**

| Description                                                                                                                                                        | Reaction                                                                                                                                                                           |
|--------------------------------------------------------------------------------------------------------------------------------------------------------------------|------------------------------------------------------------------------------------------------------------------------------------------------------------------------------------|
| <b>APS reduction</b>                                                                                                                                               |                                                                                                                                                                                    |
| APS reduction with one electron carrier (EC) that carries $n$ electrons                                                                                            | $\text{APS} + \frac{2}{n} \text{EC}_{\text{red}} \rightleftharpoons \text{SO}_3^{2-} + \text{AMP} + \frac{2}{n} \text{EC}_{\text{ox}}$                                             |
| Example of electron confurcation scheme for APS reduction                                                                                                          | $\text{APS} + 0.5\text{MKH}_2 + \text{FH} \rightleftharpoons \text{SO}_3^{2-} + \text{AMP} + 0.5\text{MK} + \text{F}$                                                              |
| <b>SO<sub>3</sub><sup>2-</sup> reduction</b>                                                                                                                       |                                                                                                                                                                                    |
| SO <sub>3</sub> <sup>2-</sup> reduction with one electron carrier (EC) that carries $n$ electrons                                                                  | $\text{SO}_3^{2-} + \frac{6}{n} \text{EC}_{\text{red}} \rightleftharpoons \text{H}_2\text{S} + \frac{6}{n} \text{EC}_{\text{ox}}$                                                  |
| SO <sub>3</sub> <sup>2-</sup> reduction with an EC transferring 2 and MKH <sub>2</sub> transferring 4 electrons                                                    | $\text{SO}_3^{2-} + \frac{2}{n} \text{EC}_{\text{red}} + 2\text{MKH}_2 \rightleftharpoons \text{H}_2\text{S} + \frac{2}{n} \text{EC}_{\text{ox}} + 2\text{MK}$                     |
| SO <sub>3</sub> <sup>2-</sup> reduction to DsrC-bound S <sup>o</sup> trisulfide with an EC transferring 2 and DsrC <sub>red</sub> transferring another 2 electrons | $\text{SO}_3^{2-} + \frac{2}{n} \text{EC}_{\text{red}} + \text{DsrC}_{\text{red}} \rightleftharpoons \text{S}^{\circ} \text{DsrC}_{\text{ox}} + \frac{2}{n} \text{EC}_{\text{ox}}$ |
| DsrC-bound S <sup>o</sup> trisulfide reduction to H <sub>2</sub> S and recycled DsrC <sub>red</sub>                                                                | $\text{S}^{\circ} \text{DsrC}_{\text{ox}} + 2\text{MKH}_2 \rightleftharpoons \text{H}_2\text{S} + \text{DsrC}_{\text{red}} + 2\text{MK}$                                           |

151  $n$  is the number of electrons carried by the respective electron carrier (EC). MKH<sub>2</sub> =  
 152 menaquinol; MK = menaquinone; F = flavodoxin (quinone); FH = flavodoxin  
 153 (semiquinone); S<sup>o</sup> DsrC<sub>ox</sub> = DsrC-bound S<sup>o</sup> trisulfide. See main text for more  
 154 information.

155

156 **Table S3. Reduction potentials and standard-state Gibbs free energies used in the**  
 157 **model.**

| Redox compound                | $E'^{\circ}$<br>[mV]* | $\Delta G'^{\circ}$ of APS<br>reduction<br>[kJ mol <sup>-1</sup> ] | $\Delta G'^{\circ}$ of SO <sub>3</sub> <sup>2-</sup><br>reduction<br>[kJ mol <sup>-1</sup> ]** | $\Delta G'^{\circ}$ of SO <sub>3</sub> <sup>2-</sup><br>reduction<br>[kJ mol <sup>-1</sup> *** |
|-------------------------------|-----------------------|--------------------------------------------------------------------|------------------------------------------------------------------------------------------------|------------------------------------------------------------------------------------------------|
| Ferredoxin ox/red             | -398                  | -60.4                                                              | -174.5                                                                                         | -41.0                                                                                          |
| Flavodoxin FH/FH <sub>2</sub> | -371                  | -55.2                                                              | -158.8                                                                                         | -35.8                                                                                          |
| Cytochrome c3 ox/red          | -290                  | -39.6                                                              | -111.9                                                                                         | -20.2                                                                                          |
| Flavodoxin F/FH               | -115                  | -5.8                                                               | -10.6                                                                                          | 13.6                                                                                           |
| MK/MKH <sub>2</sub>           | -74                   | 4.4                                                                | 20.1                                                                                           | 20.1                                                                                           |
| Rubredoxin ox/red             | -57                   | 5.4                                                                | 23.0                                                                                           | 24.8                                                                                           |
| Rubrerythrin ox/red           | 23                    | 20.8                                                               | 69.3                                                                                           | 40.2                                                                                           |

158 \* Values taken from Thauer et al. (1977).

159 \*\* The redox compound is the only electron donor.

160 \*\*\* The redox compound transfers the first 2 electrons and the remaining 4 are  
 161 originating from menaquinol oxidation.

162

163 **Table S4. Reduced to oxidized electron carrier concentrations at low respiration rates**  
164 **determined in this study.\***

| Electron carrier (EC) | $[EC_{red}]/[EC_{ox}]$ |
|-----------------------|------------------------|
| Menaquinone           | 20                     |
| Flavodoxin            | 0.7                    |
| Rubredoxin            | 5                      |
| Rubrerhythrin         | 100                    |

165 \* The values are taken from the diagonal plots in Fig. 5, i.e. assuming that a single  
166 electron carrier transfers electrons to both Apr and Dsr.

167 **Table S5. Reasonable (default) and extreme  $K_M$  values used in the model.**

| Reaction                                                                            | default $K_M$<br>[mM] | extreme $K_M$ *<br>[mM] |
|-------------------------------------------------------------------------------------|-----------------------|-------------------------|
| <hr/>                                                                               |                       |                         |
| $APS + \frac{2}{n}EC_{red} \rightleftharpoons SO_3^{2-} + AMP + \frac{2}{n}EC_{ox}$ |                       |                         |
| APS                                                                                 | 0.02                  | 0.000001                |
| EC                                                                                  | 0.1                   | 0.2                     |
| $SO_3^{2-}$                                                                         | 0.4                   | 1.3                     |
| AMP                                                                                 | 0.3                   | 0.4                     |
| <br>                                                                                |                       |                         |
| $SO_3^{2-} + \frac{6}{n}EC_{red} \rightleftharpoons H_2S + \frac{6}{n}EC_{ox}$      |                       |                         |
| $SO_3^{2-}$                                                                         | 0.05                  | 0.012                   |
| EC                                                                                  | 0.02                  | 0.02                    |
| $H_2S$                                                                              | 0.01                  | 100                     |
| <hr/>                                                                               |                       |                         |

168 \* Used only in Fig. 3B.

169

170 **References**

- 171 Bar-Even A, Noor E, Savir Y, Liebermeister W, Davidi D, Tawfik DS, *et al.* (2011). The  
172 moderately efficient enzyme: Evolutionary and physicochemical trends shaping  
173 enzyme parameters. *Biochemistry*. 50: 4402-4410.
- 174 Bramlett RN & Peck HD. (1975). Some physical and kinetic properties of adenylyl sulfate  
175 reductase from *Desulfovibrio vulgaris*. *J. Biol. Chem.* 250: 2979-2986.
- 176 Brunner B, Einsiedl F, Arnold GL, Muller I, Templer S, Bernasconi SM. (2012). The  
177 reversibility of dissimilatory sulphate reduction and the cell-internal multi-step  
178 reduction of sulphite to sulphide: insights from the oxygen isotope composition  
179 of sulphate. *Isot. Environ. Health Stud.* 48: 33-54.
- 180 Cypionka H. (1995). Solute transport and cell energetics. *In:* Barton LL (ed.) *Sulphate-*  
181 *reducing bacteria*. New York: Plenum Press.
- 182 Flamholz A, Noor E, Bar-Even A, Liebermeister W, Milo R. (2013). Glycolytic strategy as a  
183 tradeoff between energy yield and protein cost. *Proceedings of the National*  
184 *Academy of Sciences of the United States of America*. 110: 10039-10044.
- 185 Frigaard NU & Dahl C. (2009). Sulfur metabolism in phototrophic sulfur bacteria. *In:*  
186 Poole RK (ed.) *Advances in Microbial Physiology*. London: Academic Press Ltd-  
187 Elsevier Science Ltd.
- 188 Fritz G, Buchert T, Kroneck PMH. (2002). The function of the 4Fe-4S clusters and FAD in  
189 bacterial and archaeal adenylylsulfate reductases - Evidence for flavin-catalyzed  
190 reduction of adenosine 5'-phosphosulfate. *J. Biol. Chem.* 277: 26066-26073.

191 Holler T, Wegener G, Niemann H, Deusner C, Ferdelman TG, Boetius A, *et al.* (2011).  
192 Carbon and sulfur back flux during anaerobic microbial oxidation of methane and  
193 coupled sulfate reduction. *Proceedings of the National Academy of Sciences*. 108:  
194 1484-1490.

195 Lampreia J, Pereira AS, Moura JGG. (1994). Adenylylsulfate reductases from sulfate-  
196 reducing bacteria. *Methods Enzymol.* 243: 241-260.

197 Otake T, Lasaga AC, Ohmoto H. (2008). Ab initio calculations for equilibrium  
198 fractionations in multiple sulfur isotope systems. *Chem. Geol.* 249: 357-376.

199 Thauer RK, Jungermann K, Decker K. (1977). Energy conservation in chemotrophic  
200 anaerobic bacteria. *Bacteriological Reviews.* 41: 100-180.

201 Trudinger PA & Chambers LA. (1973). Reversibility of bacterial sulfate reduction and its  
202 relevance to isotope fractionation. *Geochimica Et Cosmochimica Acta.* 37: 1775-  
203 1778.

204 Trüper HG & Fischer U. (1982). Anaerobic oxidation of sulfur compounds as electron  
205 donors for bacterial photosynthesis. *Philos. Trans. R. Soc. Lond. Ser. B-Biol. Sci.*  
206 298: 529-542.

207 Wing BA & Halevy I. (2014). Intracellular metabolite levels shape sulfur isotope  
208 fractionation during microbial sulfate respiration. *Proceedings of the National*  
209 *Academy of Sciences of the United States of America.* 111: 18116-18125.

210 Wolfe BM, Lui SM, Cowan JA. (1994). Desulfovirdin, a multimeric-dissimilatory sulfite  
211 reductase from *Desulfovibrio vulgaris* (Hildenborough) - Purification,  
212 characterization, kinetics and EPR studies. *Eur. J. Biochem.* 223: 79-89.

213 Yagi T & Ogata M. (1996). Catalytic properties of adenylylsulfate reductase from  
214 Desulfovibrio vulgaris Miyazaki. *Biochimie*. 78: 838-846.  
215



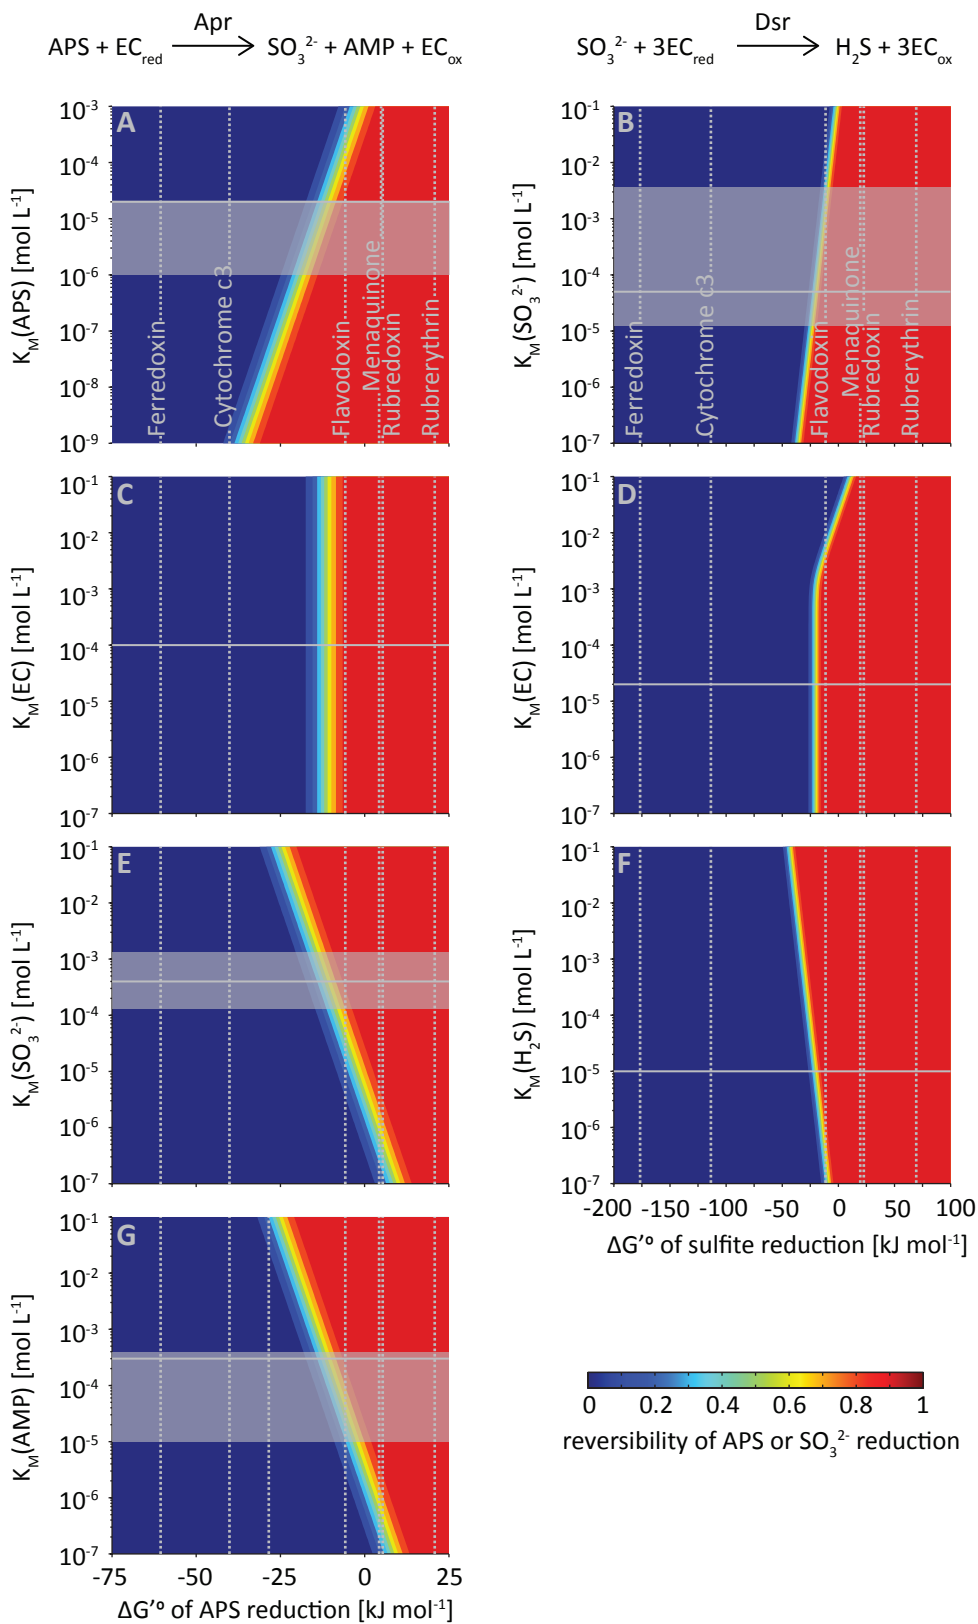

**Figure S1. Reversibility of APS (left), and sulfite reduction (right) as a function of enzyme half-saturation constants ( $K_M$ ) and Gibbs free energies of reactions at standard conditions ( $\Delta G^\circ$ ).** Full reversibility of APS and  $\text{SO}_3^{2-}$  reduction, and therefore large fractionation, is only possible when electron carriers with slightly negative to positive reduction potential are involved. Reactions that occur far from equilibrium, lead to net S isotope fractionations that are smaller than the thermodynamic limit, and are therefore inconsistent with observations and culture experiments. The figures are for a csSRR of  $0.1 \text{ fmol H}_2\text{S cell}^{-1} \text{ day}^{-1}$  and a reduced to oxidized electron carrier ratio ( $R_{r/o}$ ) of 0.01, i.e., on the plateau (see Fig. 4). The horizontal grey lines indicate the parameter values used in the default model, based on the range of available experimental data (shaded boxes; see also Dataset S1). The vertical dashed lines indicate the calculated  $\Delta G^\circ$  of the reaction with the respective electron carrier. Ferredoxin is the strongly negative reduction potential form ( $E^\circ \text{ Fd ox/red} \approx -398 \text{ mV}$ ); flavodoxin stands for the modestly negative reduction potential form ( $E^\circ \text{ F/FH} \approx -115 \text{ mV}$ ).

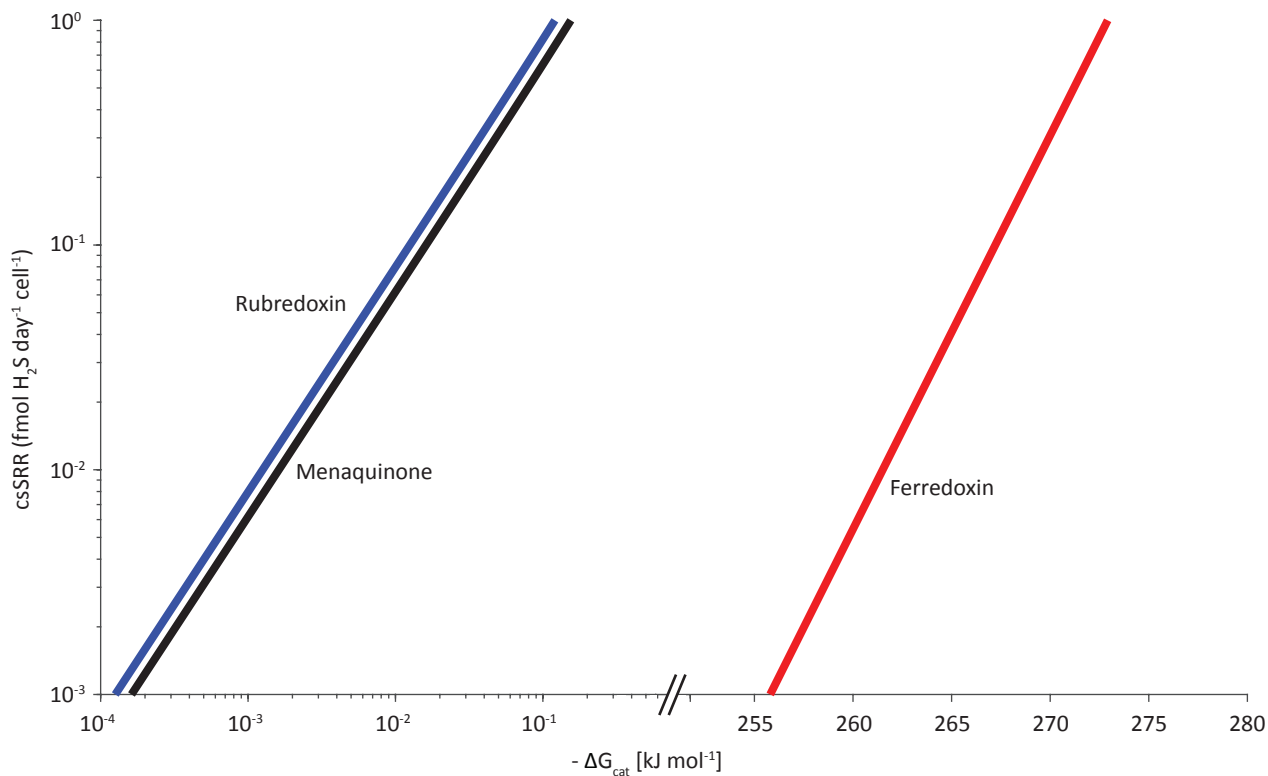

**Figure S2. Cell specific sulfate reduction rate as a function of the free energy of the catabolic reaction ( $\Delta G_{\text{cat}}$ ).** The isotope-biochemical model predicts intracellular metabolite concentrations, which determine the Gibbs free energies of each reaction step. The total calculated free energy is the sum of the free energies of all steps (sulfate uptake, activation to APS, APS reduction,  $\text{SO}_3^{2-}$  reduction to  $\text{H}_2\text{S}$ ) in the theoretical case that APS and sulfite reduction would be coupled to rubredoxin (blue line), menaquinone (black line), or ferredoxin (red line) oxidation. Our results imply that in energy-limited subsurface environments, higher respiration rates are possible when using electron carriers with modestly negative reduction potential such as rubredoxin or menaquinone.
