# Supplementary material
Source: PubMed Central journal article supplement (PMC5776465)
Supplement: ismej2017185x2.pdf [file ismej2017185x2.pdf]

| Substrate                | Organism                           | $K_m$ [mM]  | References |
|--------------------------|------------------------------------|-------------|------------|
| <b>APS reductase</b>     |                                    |             |            |
| APS                      |                                    | 0.020       |            |
|                          | <i>Desulfovibrio vulgaris</i>      | <0.001      | [1]        |
|                          | <i>Desulfovibrio vulgaris</i>      | 0.019       | [2]        |
|                          | <i>Desulfovibrio desulfuricans</i> | <0.02       | [3]        |
|                          | <i>Thiobacillus denitrificans</i>  | <0.02       | [3]        |
|                          | <i>Archaeoglobus fulgidus</i>      | 0.015       | [3]        |
| $SO_3^{2-}$              |                                    | 0.400       |            |
|                          | <i>Desulfovibrio vulgaris</i>      | 0.130       | [4]        |
|                          | <i>Desulfovibrio vulgaris</i>      | 0.600       | [5]        |
|                          | <i>Desulfovibrio desulfuricans</i> | 0.180       | [3]        |
|                          | <i>Desulfovibrio desulfuricans</i> | 0.780       | [5]        |
|                          | <i>Desulfovibrio gigas</i>         | 0.340       | [5]        |
|                          | <i>Desulfovibrio salexigens</i>    | 0.760       | [5]        |
|                          | <i>Thiobacillus denitrificans</i>  | 1.200       | [3]        |
|                          | <i>Archaeoglobus fulgidus</i>      | 1.300       | [5]        |
| AMP                      |                                    | 0.300       |            |
|                          | <i>Desulfovibrio vulgaris</i>      | 0.01 - 0.3  | [2]        |
|                          | <i>Desulfovibrio vulgaris</i>      | 0.050       | [4]        |
|                          | <i>Desulfovibrio desulfuricans</i> | 0.170       | [3]        |
|                          | <i>Desulfovibrio desulfuricans</i> | 0.160       | [5]        |
|                          | <i>Desulfovibrio desulfuricans</i> | 0.400       | [6]        |
|                          | <i>Desulfovibrio gigas</i>         | 0.160       | [5]        |
|                          | <i>Desulfovibrio salexigens</i>    | 0.310       | [5]        |
|                          | <i>Thiobacillus denitrificans</i>  | 0.020       | [3]        |
| Electron Carrier         |                                    | 0.100       |            |
| free FAD                 | <i>Desulfovibrio vulgaris</i>      | 0.01 - 0.24 | [1]        |
| cytochrome c             | <i>Desulfobulbus propionicus</i>   | 0.021       | [8]        |
| ferricyanide             | <i>Desulfovibrio gigas</i>         | 0.160       | [5]        |
|                          | <i>Archaeobacterium VC.16</i>      | 0.400       | [9]        |
|                          | <i>Desulfobulbus propionicus</i>   | 0.089       | [8]        |
| <b>Sulfite reductase</b> |                                    |             |            |
| $SO_3^{2-}$              |                                    | 0.050       |            |
|                          | <i>Desulfovibrio vulgaris</i>      | 0.060       | [9]        |
|                          | <i>Desulfovibrio vulgaris</i>      | 3.600       | [10]       |
|                          | <i>Archaeoglobus fulgidus</i>      | 0.012       | [11]       |
| $H_2S$                   |                                    | 0.010       |            |
| Electron Carrier         |                                    | 0.020       |            |

Used in calculations as default parameters

#### References

- [1] Yagi T, Ogata (1996). Catalytic properties of adenylylsulfate reductase from *Desulfovibrio vulgaris* Miyazaki. M Biochimie 78: 838-846.
- [2] Bramlett RN., Peck HD (1975). Some physical and kinetic properties of adenylyl sulfate reductase from *Desulfovibrio vulgaris*. J. Biol. Chem. 250: 2979-2986.
- [3] Fritz G, Buchert T, Kroneck PMH (2002). The function of the [4Fe-4S] clusters and FAD in bacterial and archaeal adenylylsulfate reductases: Evidence for flavin-catalyzed reduction of adenosine 5'-phosphosulfate. J. Biol. Chem. 277: 26066-26073.
- [4] Verhagen MFJM, Koeter IM, Wolbert RBG, Hagen WR (1994). On the iron-sulfur cluster of adenosine phosphosulfate reductase from *Desulfovibrio vulgaris* (Hildenborough). Eur. J. Biochem. 221: 831-837.
- [5] Lamprea J, Pereira AS, Moura JIG (1994). Adenylylsulfate reductases from sulfate-reducing bacteria. Methods Enzymol. 243: 241-260.
- [6] Odom JM, Jessie K, Knodel E, Emptage M (1991). Immunological cross-reactivities of adenosine-5'-phosphate reductases from sulfate-reducing and sulfide-oxidizing bacteria. Appl. Environ. Microbiol. 57: 727-733.
- [7] Stille W, Truper HG (1984). Adenylylsulfate reductase in some new sulfate-reducing bacteria. Arch. Microbiol. 137: 145-150.
- [8] Speich N, Truper HG (1988). Adenylylsulphate reductase in a dissimilatory sulphate-reducing *archaeobacterium*. Journal of General Microbiology. 134: 1419-1425.
- [9] Wolfe BM, Lui SM, Cowan JA (1994). Desulfovavidin, a multimeric-dissimilatory sulfite reductase from *Desulfovibrio vulgaris* (Hildenborough). Purification, characterization, kinetics and EPR studies. Eur. J. Biochem. 223: 79-89.
- [10] Kobayashi K, Seki Y, Ishimoto M (1974). Biochemical studies on sulfate-reducing bacteria. Sulfite reductase from *Desulfovibrio vulgaris*-Mechanism of trithionate, thiosulfate, and sulfide formation and enzymatic properties. J. Biochem. 75: 519-526.
- [11] Santos AA, Venceslau SS, Grein F, Leavitt WD, Dahl C, Johnston DT, Pereira IA (2015). A protein trisulfide couples dissimilatory sulfate reduction to energy conservation. Science. 350: 1541-1545.
